# Supplementary material for: Controlled preparation of high quality WS2 nanostructures by a microwave-assisted solvothermal method
Source: Royal Society of Chemistry journal article supplement (doi:10.1039/c8ce00057c), 2018-01-01
Supplement: c8ce00057c1.pdf [file c8ce00057c1.pdf]

## Supporting Information for

# Controlled Preparation of High Quality WS<sub>2</sub> Nanostructures by Microwave-Assisted Solvothermal Method

Haiting Yan<sup>a</sup>, Jianhui Li<sup>a</sup>, Daomeng Liu<sup>a</sup>, Xunan Jing<sup>a</sup>, Daquan Wang<sup>a</sup>, and Lingjie Meng<sup>\*a,b</sup>

<sup>a</sup> School of Science; State Key Laboratory for Mechanical Behavior of Materials; MOE Key Laboratory for Nonequilibrium Synthesis and Modulation of Condensed Matter, Xi'an Jiaotong University, Xi'an 710049, China.

<sup>b</sup> Instrumental Analysis Center, Xi'an Jiaotong University, Xi'an 710049, China.

E-mail: [menglingjie@mail.xjtu.edu.cn](mailto:menglingjie@mail.xjtu.edu.cn)

| WS <sub>2</sub> Morphology | Mass of WCl <sub>6</sub> (g) | Mass of S (g) | Volume of NMP (ml) | Temperature (°C) | Reaction Time (h) |
|----------------------------|------------------------------|---------------|--------------------|------------------|-------------------|
| Nanoworms                  | 0.112                        | 0.18          | 30                 | 240              | 7                 |
| Nanosheets                 | 0.446                        | 0.72          | 30                 | 240              | 7                 |
| Nanocones                  | 0.892                        | 1.44          | 30                 | 240              | 7                 |

**Table S1.** The experimental parameters of obtained WS<sub>2</sub> nanostructure.

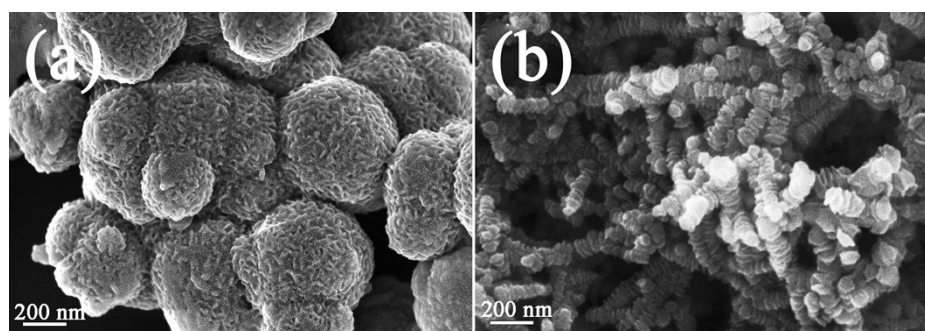

**Figure S1.** SEM images of the (a) MoS<sub>2</sub> nanocones (240 °C, 7h, MoCl<sub>5</sub> 0.614 g, S 1.44 g, NMP 30 ml); (b) hierarchical MoS<sub>2</sub> nanoworms (240 °C, 7h, MoCl<sub>5</sub> 0.077 g, S 0.18 g, NMP 30 ml).

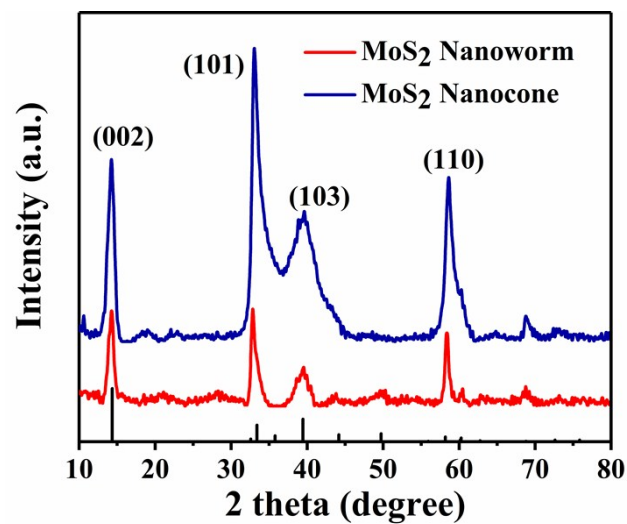

**Fig.S2.** XRD patterns of MoS<sub>2</sub> nanocones and MoS<sub>2</sub> nanoworms.

| Elementals | Nanosheets | Nanocones | Nanoworms |
|------------|------------|-----------|-----------|
| W (atom%)  | 27.03      | 28.22     | 36.18     |
| S (atom%)  | 47.83      | 48.18     | 53.25     |
| O (atom%)  | 25.23      | 23.6      | 10.57     |

**Table S2.** Elemental analyses of WS<sub>2</sub> nanosheets, WS<sub>2</sub> nanocones, and WS<sub>2</sub> Nanoworms.

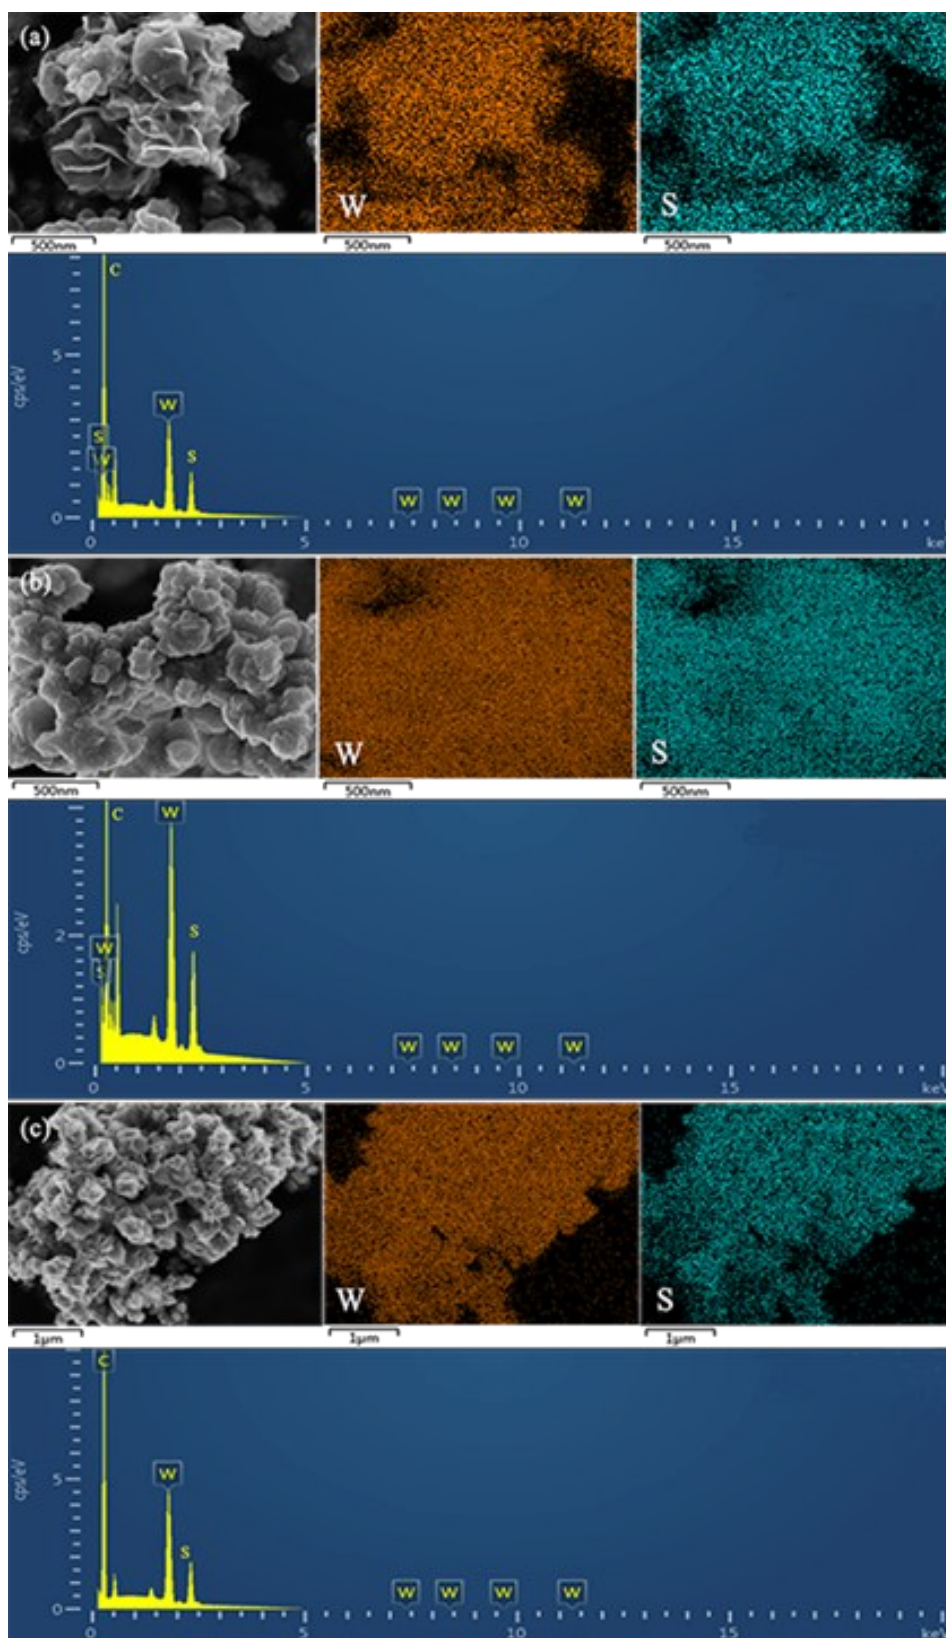

**Fig.S3.** (a-c) EDS-Mapping of the (a) WS<sub>2</sub> nanosheets, (b) WS<sub>2</sub> nanocones, (c) hierarchical WS<sub>2</sub> nanoworm.

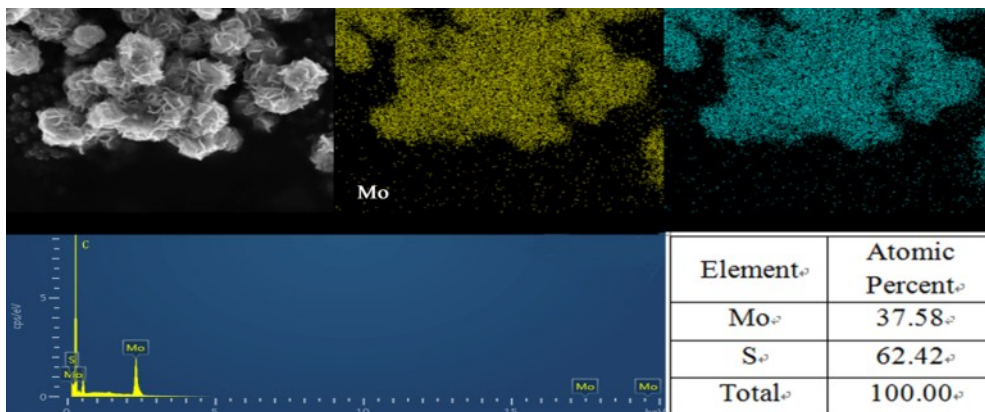

Fig.S4. (a-d) EDS-mapping measurement of MoS<sub>2</sub> nanocones.

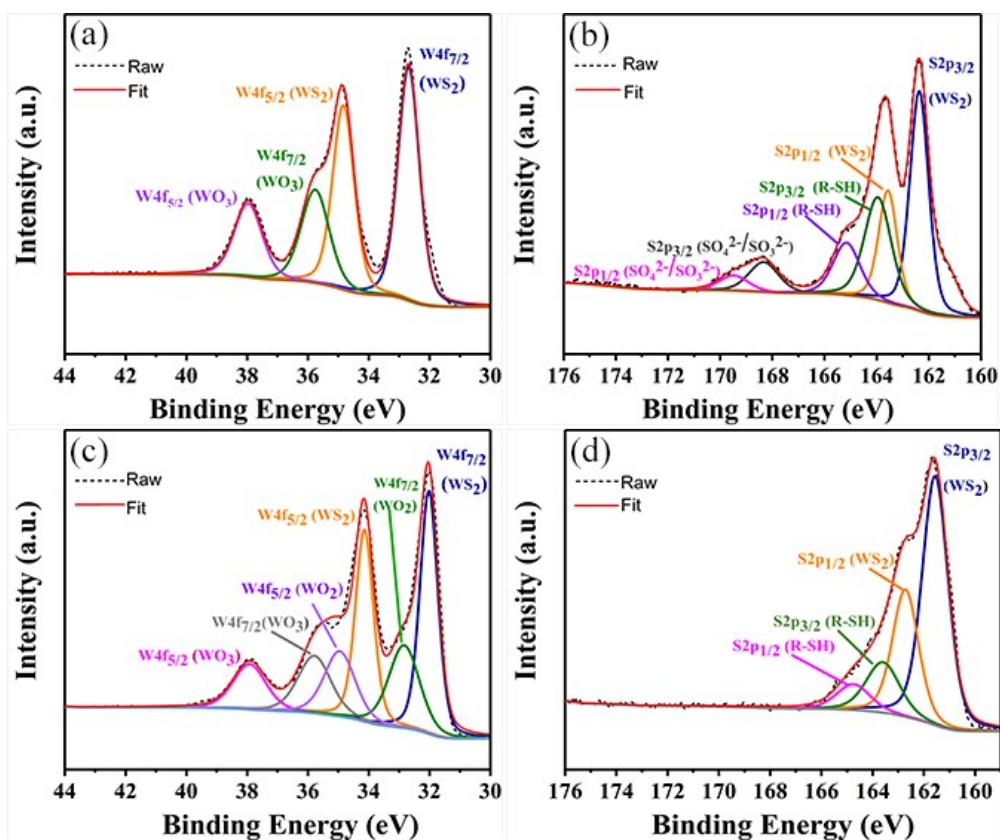

Fig.S5. XPS spectra of WS<sub>2</sub> nanocones and WS<sub>2</sub> nanoworm. (a,c) Elemental XPS spectra of W4f in WS<sub>2</sub> nanocones and WS<sub>2</sub> nanoworm respectively ; (b,d) Elemental XPS spectra of S2p in WS<sub>2</sub> nanocones and WS<sub>2</sub> nanoworm respectively.

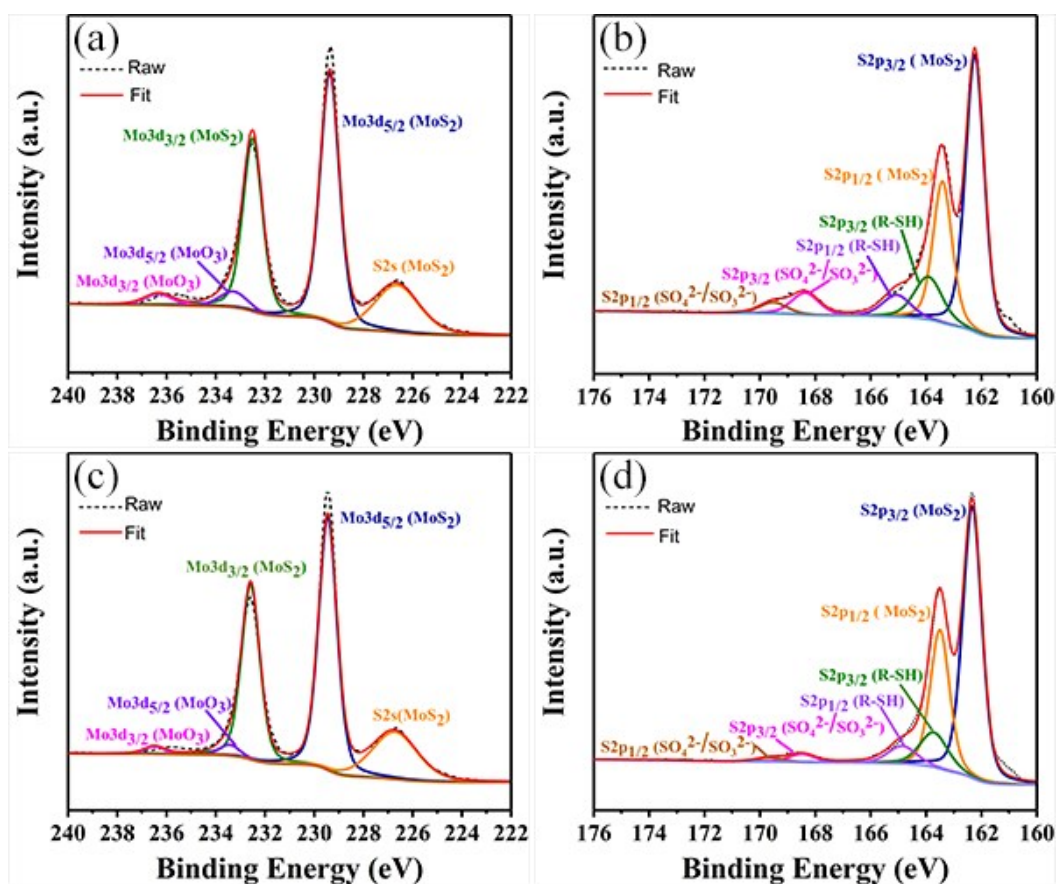

**Fig.S6.** XPS spectra of MoS<sub>2</sub> nanocones and MoS<sub>2</sub> nanoworm. **(a,c)** Elemental XPS spectra of Mo3d in MoS<sub>2</sub> nanocones and MoS<sub>2</sub> nanoworm respectively; **(b,d)** Elemental XPS spectra of S2p in MoS<sub>2</sub> nanocones and MoS<sub>2</sub> nanoworm respectively.
